# Supplementary material
Source: publisher figshare collection journal article supplement (https://aacr.figshare.com/articles/dataset/_/22363671)

# Regl\_etal, suppl. Figure1

## A

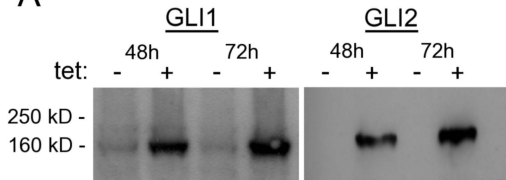

## B

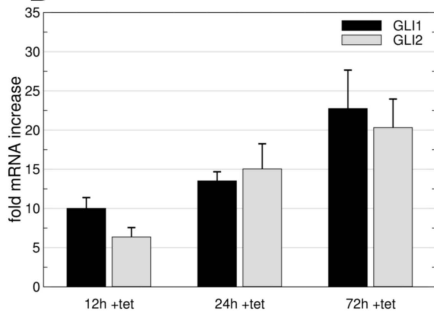

## C

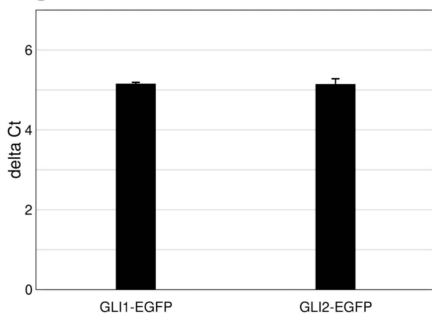

Supplement: Supplementary file 1 [file 39807882]
